# Supplementary material for: Interdependence of cellular and network properties in respiratory rhythm generation
Source: PubMed Central journal article supplement — Proc Natl Acad Sci U S A. 2024 May 1;121(19):e2318757121. doi: 10.1073/pnas.2318757121 (PMC11087776; doi:10.1073/pnas.2318757121), 2024-05-01
Supplement: pnas.2318757121.sapp.pdf [file pnas.2318757121.sapp.pdf]

# PNAS



1

## 2 **Supporting Information for**

### 3 **Interdependence of cellular and network properties in respiratory rhythm generation**

4 **Ryan S. Phillips, and Nathan A. Baertsch**

5 **Ryan Phillips, Nathan Baertsch**

6 **E-mail: [Ryan.Phillips@seattlechildrens.org](mailto:Ryan.Phillips@seattlechildrens.org), [Nathan.Baertsch@seattlechildrens.org](mailto:Nathan.Baertsch@seattlechildrens.org)**

#### 7 **This PDF file includes:**

8 Supporting text

9 Figs. S1 to S15

10 Table S1

11 SI References

## 12 Supporting Information Text

### 13 Supplementary Methods.

14 **Neuron Model.** Model preBötC neurons include a single compartment and incorporate Hodgkin-Huxley style conductances  
 15 adapted from previously described models (1–3) and/or experimental data as detailed below. The membrane potential of each  
 16 neuron is governed by the following differential equation:

$$17 \quad C \frac{dV}{dt} = -I_{Na} - I_K - I_{SPK} - I_{AHP} - I_{NaP} - I_{Ca} - I_{Leak} - I_{Tonic} - I_{Syn}, \quad [1]$$

18 where  $C = 36 \text{ pF}$  is the membrane capacitance and each  $I_i$  represents a current, with  $i$  denoting the current's type. The currents  
 19 include the action potential generating  $\text{Na}^+$  and delayed rectifying  $\text{K}^+$  currents ( $I_{Na}$  and  $I_K$ ), a high voltage activated  $\text{Na}^+$   
 20 and  $\text{K}^+$  currents for augmenting spike amplitude ( $I_{SPK}$ ) and AHP ( $I_{AHP}$ ), a persistent  $\text{Na}^+$  current ( $I_{NaP}$ ), voltage-gated  
 21  $\text{Ca}^{2+}$  current ( $I_{Ca}$ ),  $\text{K}^+$  dominated leak current ( $I_{Leak}$ ), a tonic excitatory synaptic current ( $I_{Tonic}$ ) and a dynamic excitatory  
 22 synaptic current ( $I_{Syn}$ ) which mediates preBötC network interactions. The currents are defined as follows:

$$23 \quad I_{Na} = g_{Na} \cdot m_{Na}^3 \cdot h_{Na} \cdot (V - E_{Na}) \quad [2]$$

$$24 \quad I_K = g_K \cdot m_K^4 \cdot (V - E_K) \quad [3]$$

$$25 \quad I_{SPK} = g_{SPK} \cdot m_{SPK} \cdot h_{SPK} \cdot (V - E_{Na}) \quad [4]$$

$$26 \quad I_{AHP} = g_{AHP} \cdot m_{AHP} \cdot (V - E_K) \quad [5]$$

$$27 \quad I_{NaP} = g_{NaP} \cdot m_{NaP} \cdot h_{NaP} \cdot (V - E_{Na}) \quad [6]$$

$$28 \quad I_{Ca} = g_{Ca} \cdot m_{Ca} \cdot h_{Ca} \cdot (V - E_{Ca}) \quad [7]$$

$$29 \quad I_{Leak} = g_{Leak} \cdot (V - E_{Leak}) \quad [8]$$

$$30 \quad I_{Tonic} = g_{Tonic} \cdot (V - E_{Syn}) \quad [9]$$

$$31 \quad I_{Syn} = g_{Syn} \cdot (V - E_{Syn}), \quad [10]$$

32 where  $g_i$  is the maximum conductance,  $E_i$  is the reversal potential, and  $m_i$  and  $h_i$  are gating variables for channel activation  
 33 and inactivation for each current  $I_i$ . The glutamatergic synaptic conductance  $g_{Syn}$  is dynamic and is defined below (Eq. 18).  
 34 The values used for the  $g_i$  and  $E_i$  appear in Table S1.

**Table S1. Ionic Channel Parameters.**

| Channel     | Parameters                                                                                                                                                                                                                               |                                                                                                                                                                                     |                                                                                                         |                                                                        |                                                              |
|-------------|------------------------------------------------------------------------------------------------------------------------------------------------------------------------------------------------------------------------------------------|-------------------------------------------------------------------------------------------------------------------------------------------------------------------------------------|---------------------------------------------------------------------------------------------------------|------------------------------------------------------------------------|--------------------------------------------------------------|
| $I_{Na}$    | $g_{Na} = 150 \text{ nS}$<br>$m_{1/2} = -43.8 \text{ mV}$<br>$h_{1/2} = -67.5 \text{ mV}$                                                                                                                                                | $E_{Na} = 26.54 \cdot \ln(\text{Na}_{out} = 120 \text{ mM} / \text{Na}_{in} = 15 \text{ mM}) \approx 55.188 \text{ mV}$<br>$k_m = 6.0 \text{ mV}$<br>$k_h = -11.8 \text{ mV}$       | $\tau_{max}^m = 0.25 \text{ ms}$<br>$\tau_{max}^h = 8.46 \text{ ms}$                                    | $\tau_{1/2}^m = -43.8 \text{ mV}$<br>$\tau_{1/2}^h = -67.5 \text{ mV}$ | $k_\tau^m = 14.0 \text{ mV}$<br>$k_\tau^h = 12.8 \text{ mV}$ |
| $I_K$       | $g_K = 220 \text{ nS}$<br>$A_\alpha = 0.011$<br>$A_\beta = 0.17$                                                                                                                                                                         | $E_K = 26.54 \cdot \ln(\text{K}_{bath} = 8.5 \text{ mM} / \text{K}_{in} = 125 \text{ mM}) \approx -71.35 \text{ mV}$<br>$B_\alpha = 44.0 \text{ mV}$<br>$B_\beta = 49.0 \text{ mV}$ | $k_\alpha = 5.0 \text{ mV}$<br>$k_\beta = 40.0 \text{ mV}$                                              |                                                                        |                                                              |
| $I_{SPK}$   | $g_{SPK} = \text{Variable}$<br>$m_{1/2} = -27.5 \text{ mV}$<br>$h_{1/2} = -27.5 \text{ mV}$                                                                                                                                              | $k_m = 1 \text{ mV}$<br>$k_h = -1 \text{ mV}$                                                                                                                                       | $\tau_m = 0.5 \text{ ms}$<br>$\tau_h = 5 \text{ ms}$                                                    |                                                                        |                                                              |
| $I_{AHP}$   | $g_{AHP} = \text{Variable}$<br>$m_{1/2} = -27.5 \text{ mV}$                                                                                                                                                                              | $k_m = 1 \text{ mV}$                                                                                                                                                                | $\tau_m = 5 \text{ ms}$                                                                                 |                                                                        |                                                              |
| $I_{NaP}$   | $g_{NaP} = N(\mu_{NaP}, \sigma_{NaP})$<br>$m_{1/2} = -47.1 \text{ mV}$<br>$h_{1/2} = -60.0 \text{ mV}$                                                                                                                                   | $\mu_{NaP} = 3.33 \text{ nS}$<br>$k_m = 3.1 \text{ mV}$<br>$k_h = -9.0 \text{ mV}$                                                                                                  | $\sigma_{NaP} = 0.75 \text{ nS}$<br>$\tau_{max}^m = 1.0 \text{ ms}$<br>$\tau_{max}^h = 5000 \text{ ms}$ | $\tau_{1/2}^m = -47.1 \text{ mV}$<br>$\tau_{1/2}^h = -60.0 \text{ mV}$ | $k_\tau^m = 6.2 \text{ mV}$<br>$k_\tau^h = 9.0 \text{ mV}$   |
| $I_{Leak}$  | $g_{Leak} = N(\mu_{leak}, \sigma_{leak})$<br>$E_{Leak} = -26.54 \cdot \ln[(P_{Na} \cdot \text{Na}_{in} + P_K \cdot \text{K}_{in}) / (P_{Na} \cdot \text{Na}_{out} + P_K \cdot \text{K}_{bath})]$<br>$E_{Leak} \approx -63.73 \text{ mV}$ | $\sigma_{leak} = 0.05 \cdot \mu_{leak}$<br>$\mu_{leak} = \exp((K_{Bath} - 3.425) / 4.05)$                                                                                           |                                                                                                         | $P_{Na} = 1$                                                           | $P_K = 42$                                                   |
| $I_{Tonic}$ | $g_{Tonic} = \text{Variable}$                                                                                                                                                                                                            | $E_{Syn} = 0.0 \text{ mV}$                                                                                                                                                          |                                                                                                         |                                                                        |                                                              |
| $I_{Syn}$   | $g_{Syn} = \text{Dynamic, See Eq. 18}$                                                                                                                                                                                                   | $E_{Syn} = 0.0 \text{ mV}$                                                                                                                                                          | $\tau_{Syn} = 5.0 \text{ ms}$                                                                           |                                                                        |                                                              |

Activation ( $m_i$ ) and inactivation ( $h_i$ ) of voltage-dependent channels are described by the following differential equation:

$$\tau_X(V) \cdot \frac{dX}{dt} = X_\infty(V) - X; \quad X \in \{m, h\} \quad [11]$$

where  $X_\infty$  represents steady-state activation/inactivation and  $\tau_X$  is a time constant. For  $I_{Na}$ ,  $I_{NaP}$ ,  $I_{Ca}$ ,  $I_{SPK}$ , and  $I_{AHP}$ , the functions  $X_\infty$  and  $\tau_X$  take the forms

$$X_\infty(V) = 1/(1 + \exp(-(V - X_{1/2})/k_X)), \quad [12]$$

$$\tau_X(V) = \tau_{max}^X / \cosh((V - \tau_{1/2}^X)/k_\tau^X). \quad [13]$$

The values of the parameters ( $X_{1/2}$ ,  $k_X$ ,  $\tau_{max}^X$ ,  $\tau_{1/2}^X$ , and  $k_\tau^X$ ) corresponding to  $I_{Na}$ ,  $I_{NaP}$ ,  $I_{Ca}$ ,  $I_{SPK}$  and  $I_{AHP}$  are given in Table S1.

For  $I_K$ , steady-state activation  $m_\infty^K(V)$  and time constant  $\tau_m^K(V)$  are given by the expressions

$$m_\infty^K(V) = \alpha_\infty(V)/(\alpha_\infty(V) + \beta_\infty(V)), \quad [14]$$

$$\tau_m^K(V) = 1/(\alpha_\infty(V) + \beta_\infty(V)) \quad [15]$$

where

$$\alpha_\infty(V) = A_\alpha \cdot (V + B_\alpha)/(1 - \exp(-(V + B_\alpha)/k_\alpha)), \quad [16]$$

$$\beta_\infty(V) = A_\beta \cdot \exp(-(V + B_\beta)/k_\beta). \quad [17]$$

The values for the constants  $A_\alpha$ ,  $A_\beta$ ,  $B_\alpha$ ,  $B_\beta$ ,  $k_\alpha$ , and  $k_\beta$  are also given in Table S1.

When we include multiple neurons in the network, we index them with subscripts. Then the total synaptic conductance  $(g_{Syn})_i$  of the  $i^{th}$  target neuron is described by the following equation:

$$(g_{Syn})_i = g_{Tonic} + \sum_{j \neq i; n} W_{j,i} \cdot D_j \cdot C_{j,i} \cdot H(t - t_{j,n}) \cdot e^{-(t - t_{j,n})/\tau_{syn}}, \quad [18]$$

where  $W_{j,i}$  represents the weight of the synaptic connection from neuron  $j$  to neuron  $i$ ,  $D_j$  is a scaling factor for short-term synaptic depression in the presynaptic neuron  $j$  (described in more detail below),  $C_{j,i}$  is an element of the connectivity matrix ( $C_{j,i} = 1$  if neuron  $j$  makes a synapse with neuron  $i$  and  $C_{j,i} = 0$  otherwise),  $H(\cdot)$  is the Heaviside step function, and  $t$  denotes time.  $\tau_{syn}$  is an exponential synaptic decay constant, while  $t_{j,n}$  is the time at which the  $n^{th}$  action potential generated by neuron  $j$  reaches neuron  $i$ .

This model includes short-term synaptic depression motivated by experimental observations in the preBötC (4) and past computational models have suggested (5, 6). Synaptic depression in the  $j^{th}$  neuron ( $D_j$ ) was simulated using an established mean-field model of short-term synaptic dynamics (7–9) as follows:

$$\frac{dD_j}{dt} = \frac{D_0 - D_j}{\tau_D} - \alpha_D \cdot D_j \cdot \delta(t - t_j). \quad [19]$$

Where the parameter  $D_0 = 1$  sets the maximum value of  $D_j$ ,  $\tau_D = 1000 \text{ ms}$  sets the rate of recovery from synaptic depression,  $\alpha_D = 0.2$  sets the fractional depression of the synapse each time neuron  $j$  spikes and  $\delta(\cdot)$  is the Kronecker delta function which equals one at the time of each spike in neuron  $j$  and zero otherwise. Parameters were chosen to qualitatively match data from (4).

**Network construction.** The preBötC network was constructed with random synaptic connectivity distribution where the connection probability of  $P_{Syn} = 13\%$  as motivated by available experimental estimates (10). The weights of excitatory conductances were uniformly distributed such that  $W_{j,i} = U(0, W_{Max})$ , where  $W_{Max} = 0.2 \text{ nS}$  is the maximal synaptic conductance.

Heterogeneity of intrinsic cellular properties was introduced into the network by normally distributing the parameters  $g_{leak}$  and  $g_{NaP}$  (Table S1) as well as by uniformly distributing  $g_{SPK}$  in Figs. 4–7 to introduce spike amplitude variability. The *leak* and *NaP* conductances were conditionally distributed in order to achieve a bivariate normal distribution, as suggested by (11, 12). In our simulations, this was achieved by first normally distributing  $g_{NaP}$  in each neuron according to the values presented in Table S1. Then a property of bivariate normal distribution was used which says that the conditional distribution of  $g_{leak}$  given  $g_{NaP}$  is itself a normal distribution with mean ( $\mu_{Leak}^*$ ) and standard deviation ( $\sigma_{Leak}^*$ ) described as follows:

$$\mu_{Leak}^* = \mu_{Leak} + \rho \cdot (\sigma_{Leak}/\sigma_{NaP}) \cdot (g_{NaP}^i - \mu_{NaP}), \quad [20]$$

$$\sigma_{Leak}^* = \sqrt{(1 - \rho^2) \cdot \sigma_{Leak}^2} \quad [21]$$

In these equations,  $\mu_{Leak}$  and  $\mu_{NaP}$  are the mean and  $\sigma_{Leak}$  and  $\sigma_{NaP}$  are the standard deviation of the  $g_{Leak}$  and  $g_{NaP}$  distributions, while  $\rho = 0.8$  represents the correlation coefficient and  $g_{NaP}^i$  represents the persistent sodium current conductance for the  $i^{th}$  neuron. All parameters are given in Table S1.

81 **Simulating hypoxia.** To simulate the combined effects of hypoxia, we imposed changes in  $V_{1/2}^{Na}$  and elevated  $[Na^+]_{in}$  that were  
 82 each fit to a sigmoidal function. Because the shift in  $V_{1/2}^{Na}$  occurs relatively rapidly (within 40s) (13) and the resulting  
 83 depolarization and increased spiking activity is expected to exacerbate  $[Na^+]_{in}$  accumulation as the  $Na^+/K^+$ -ATPase pump  
 84 becomes compromised, hypoxia was simulated as an initial change in  $V_{1/2}^{Na}$  followed by accumulation of  $[Na^+]_{in}$ .

85 **Simulating temperature dependent changes in gating time constants and membrane capacitance.** The rate constants for channel gating  
 86 change exponentially with temperature and is characterized by a Q10 temperature coefficient, which is a measure of the degree  
 87 to which the rate of a biological process depends on temperature over 10°C (14). Q10 values commonly observed for rate  
 88 constants of voltage-dependent gating dynamics typically range from 1 to 3 (15–17). For simplicity and feasibility of these  
 89 experiments, we assumed a Q10 of 1.5 in all voltage-dependent channel rate constants (17, 18). The resulting scaling factor  
 90 (SI Appendix, Fig. S12B) was then multiplied by all of the time constants of the voltage-dependent gating variables ( $\tau_X(V)$ ,  
 91 Eq. 13) as well as the time constants for the synaptic current ( $\tau_{syn}$  in Eq. 18) and the rate of recovery from synaptic depression  
 92 ( $\tau_D$ , Eq. 19). In addition to changes in rate constants, cells also experience a temperature-dependent increase in surface  
 93 area, leading to changes in capacitance (19–21) at a rate of approximately 0.3% per °C (22). As such, the model membrane  
 94 capacitance was increased at a rate of 0.3% per °C (see Fig.7 & SI Appendix, Fig. S12C).

95 **Data analysis and definitions.** Data generated from simulations was post-processed in MATLAB software ver. R2020b (MathWorks,  
 96 Natick, MA, USA). An action potential was defined to have occurred in a neuron when its membrane potential  $V_m$  increased  
 97 through  $-35mV$ . Histograms of population activity were calculated as the number of action potentials per 20ms bin per  
 98 neuron, with units of Hz. The amplitudes and frequency of network rhythms were determined by first identifying the peaks  
 99 and then calculating the inverse of the interpeak interval from the population histograms. Burst initiation (Fig.3) was defined  
 100 as the peak in  $I_{NaP}$  recovery of channel availability/inactivation ( $h_{NaP}$ ). Quantification of spike amplitude and AHP as a  
 101 function of  $g_{SPK}$ ,  $g_{AHP}$ , or other parameter manipulations (as in Figs.5–7) was done with  $g_{NaP} = 0nS$  to eliminate intrinsic  
 102 bursting which would make quantification of AHP impossible. To quantify the percentage of the population that became active  
 103 since the prior burst we counted the number of neurons in the population that spiked starting 500ms after the peak of one  
 104 burst to 500ms after the peak of the next burst, except in cases where the burst duration was longer than 500ms in which  
 105 case this window was manually extended.

106 **Integration methods.** All simulations were performed locally on an eight-core computer running the Ubuntu 20.04 operating  
 107 system. Simulation software was custom written in C++ and compiled with g++ version 9.3.0. Numerical integration was  
 108 performed using the first-order Euler method with a fixed step-size ( $\Delta t$ ) of 0.025ms. All model codes will be made freely  
 109 available on GitHub upon publication of this work.

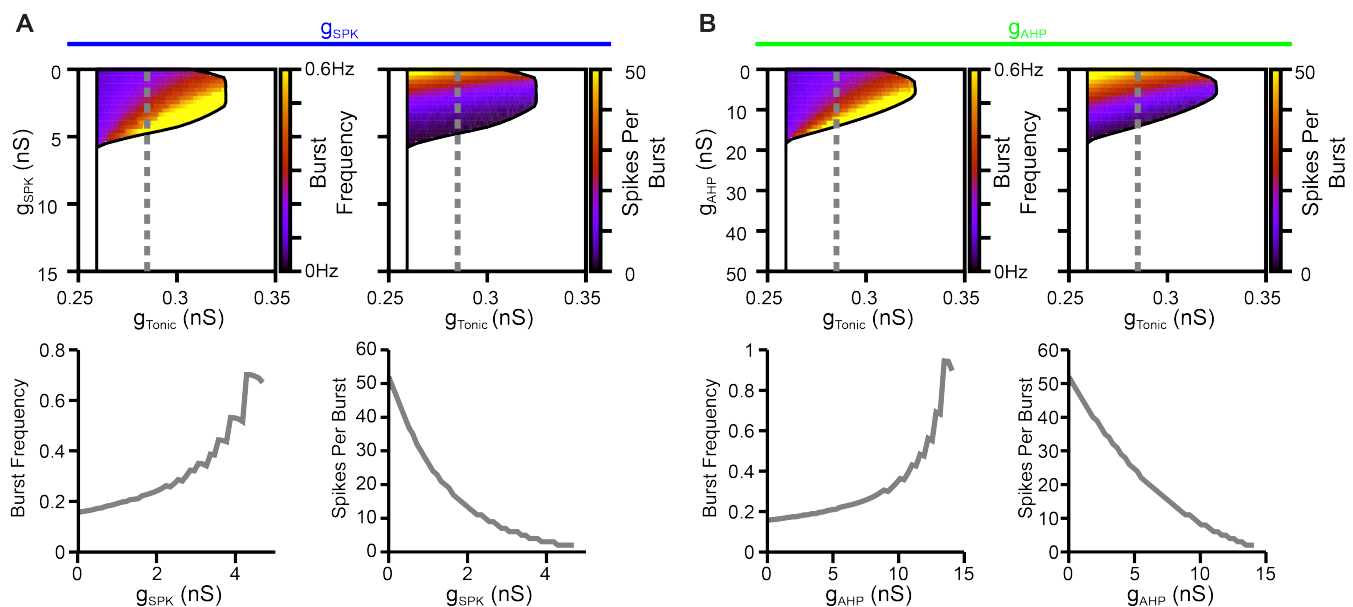

Fig. S1. Effect of changes in (A)  $g_{SPK}$  or (B)  $g_{AHP}$  on burst frequency (left) and the number of spikes per burst (right).

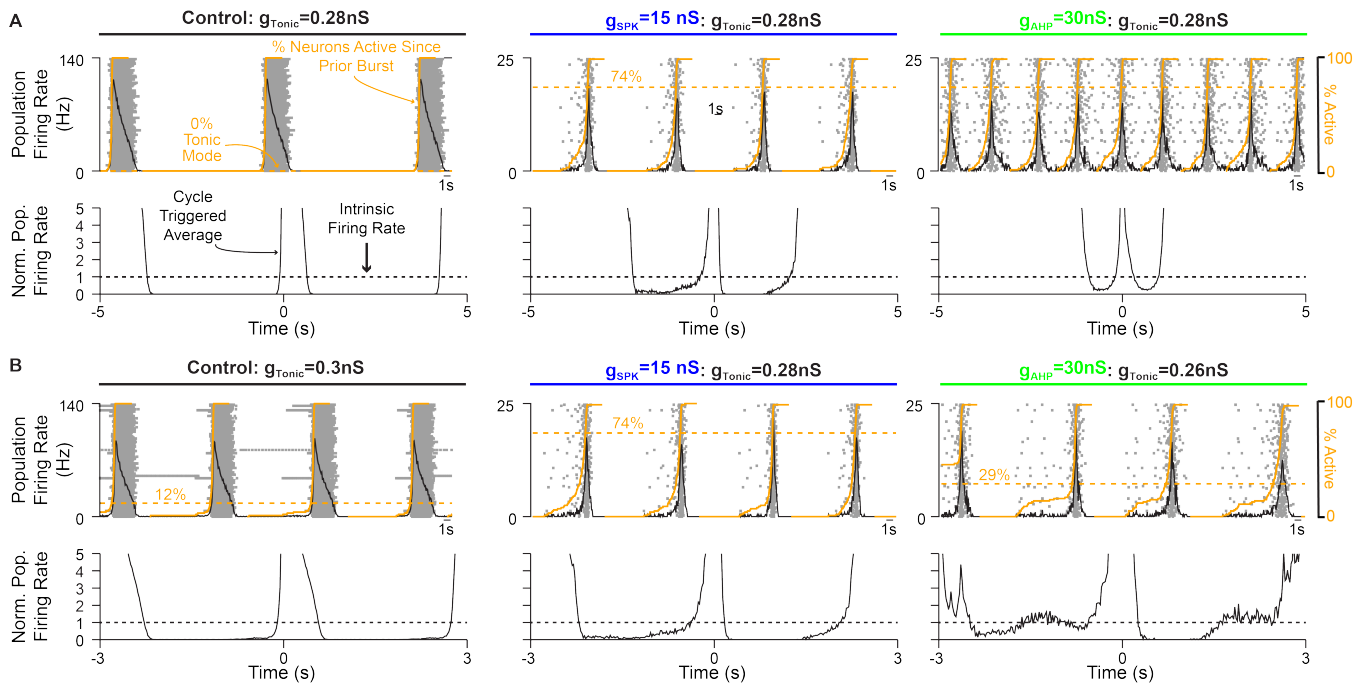

**Fig. S2. Relationship between pre-inspiratory spiking, the percentage of neurons in tonic spiking mode and the intrinsic network firing rate.** Example traces (top) and cycle triggered averages (bottom) in networks with (A) fixed excitability ( $g_{Tonic}$ ) or (B) altered excitability such that network frequencies are roughly equal ( $\approx 3$  Hz). Horizontal yellow dashed line indicates the percentage of neurons in tonic spiking mode. The gray horizontal dashed line indicates the intrinsic network firing rate. Notice that the emergence of pre-inspiratory spiking coincides with the transition of neurons into tonic mode in the control network and in networks with altered spike shapes.

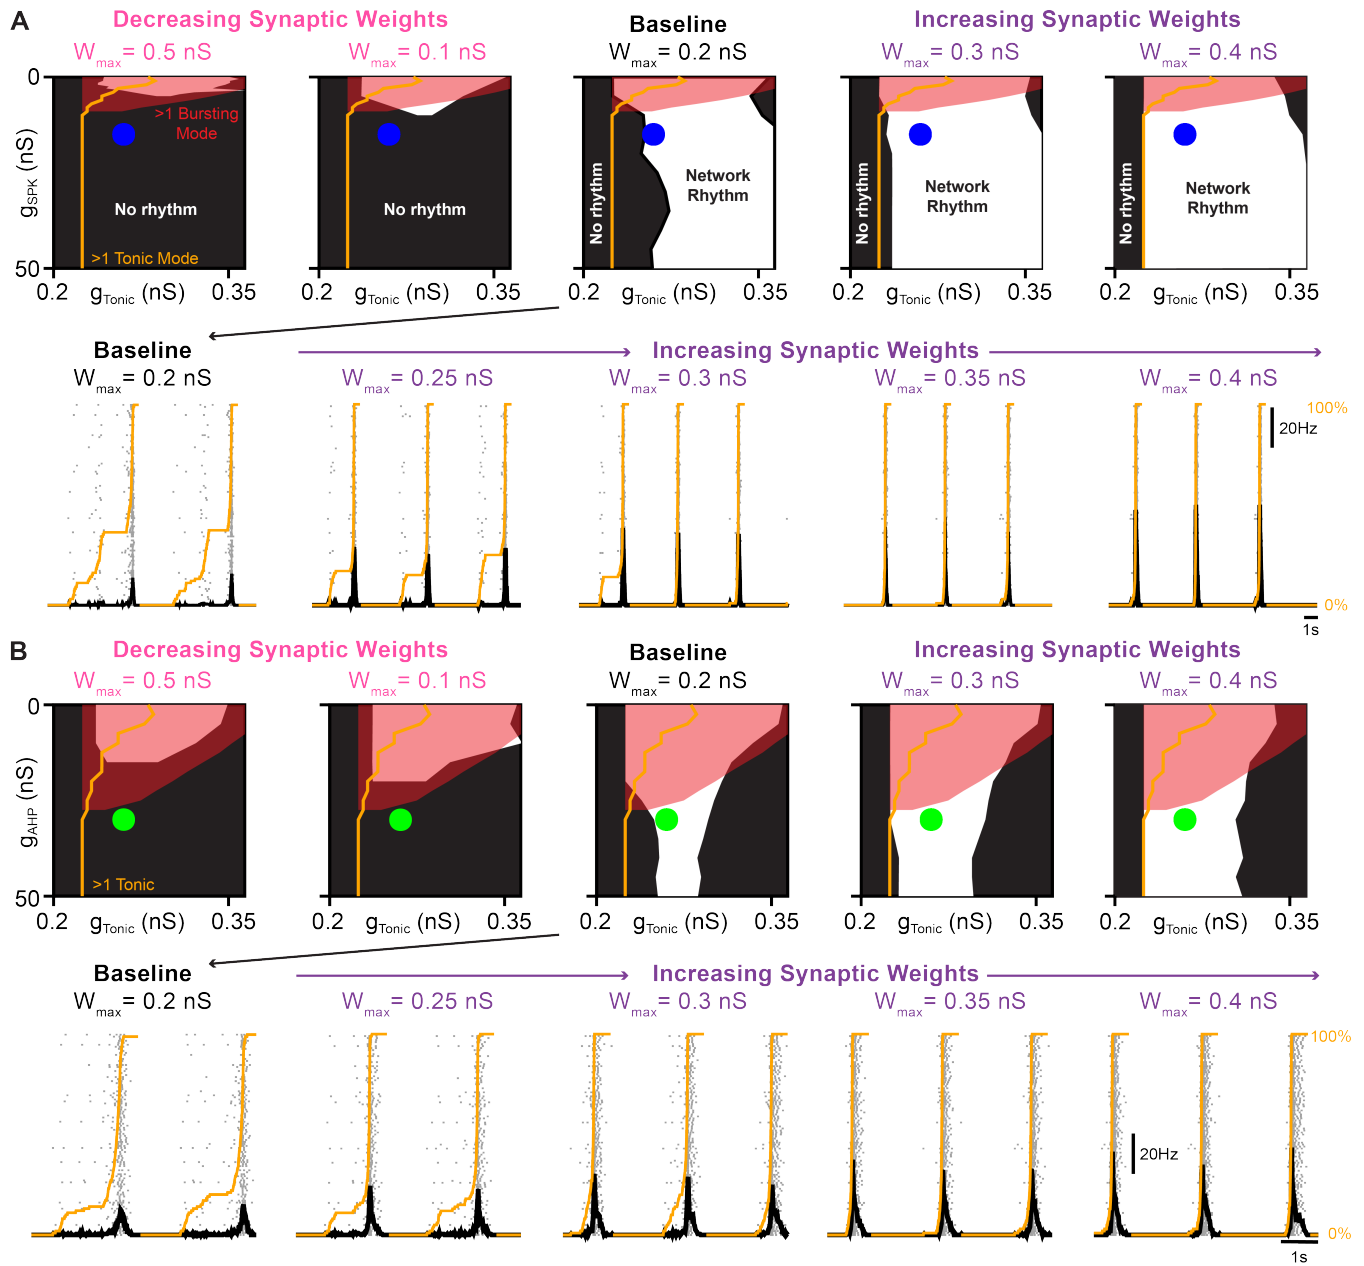

**Fig. S3. Interactions between spike shape, intrinsic bursting, and synaptic weight for network rhythgenesis.** In networks with (A) altered  $g_{SPK}$  or (B) altered  $g_{AHP}$  the parameter space supporting network rhythgenesis (white regions) was collapsed by decreasing synaptic weights and expanded by increasing synaptic weights. Blue ( $g_{AHP} = 30 \text{ nS}$ ) and green ( $g_{SPK} = 15 \text{ nS}$ ) dots correspond to  $g_{SPK}/g_{AHP}$  and  $g_{Tonic}$  values of representative traces at baseline and during increasing synaptic weight. Orange lines in example traces indicate the percentage of neurons in the network that have become active since the preceding network burst.

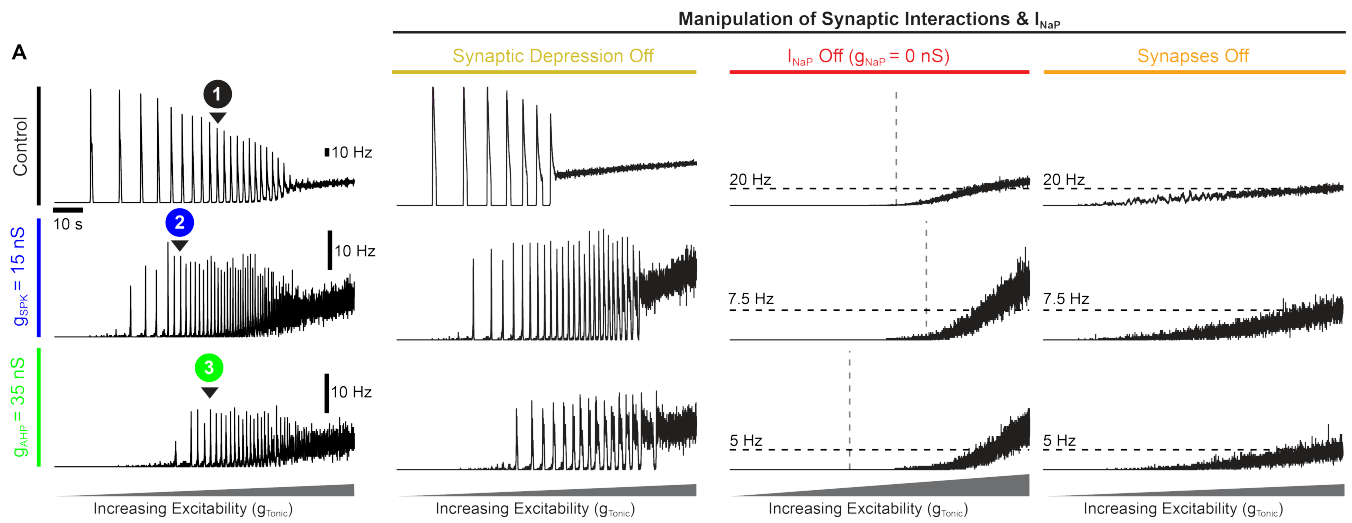

**Fig. S4. Interdependence of  $I_{NaP}$  and synaptic interactions for network rhythmogenesis.** (A) Activity of networks with all burst-capable (control) or burst-incapable ( $g_{SPK} = 15 \text{ nS}$  or  $g_{AHP} = 35 \text{ nS}$ ) neurons following elimination of synaptic depression,  $I_{NaP}$ , or all synaptic interactions. Notice, in the absence of synaptic depression, the excitability range supporting rhythmogenesis was substantially reduced in control networks with 100% burst-capable neurons but slightly increased in networks lacking intrinsic bursting.

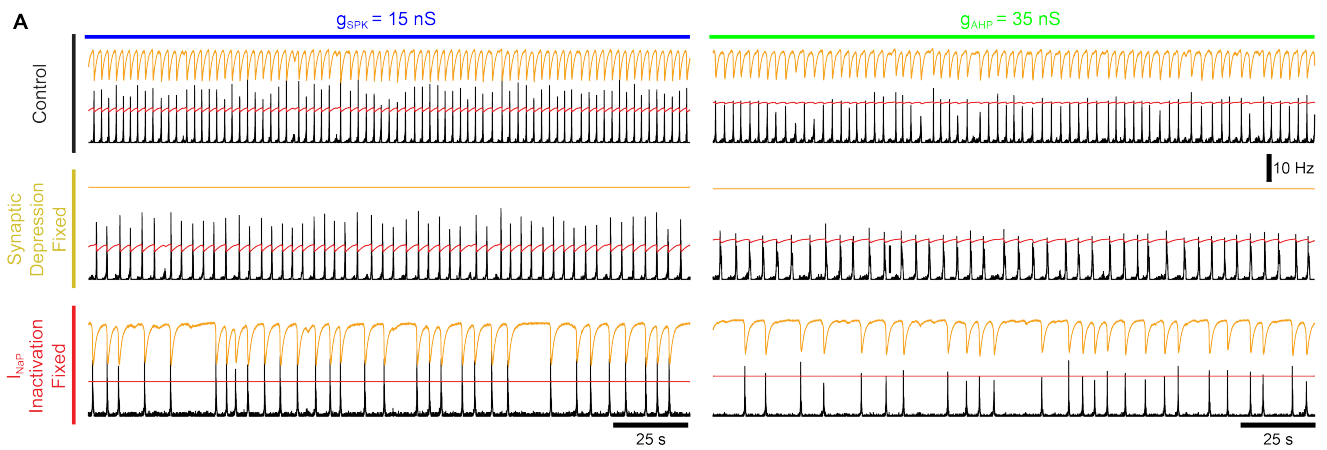

**Fig. S5.** Example network activity (firing rate) and corresponding synaptic depression (orange lines) and  $I_{NaP}$  inactivation (red lines) in networks with  $g_{SPK} = 15 \text{ nS}$  (left) or  $g_{AHP} = 35 \text{ nS}$  (right) under baseline conditions (top) or after fixing synaptic depression (middle) or  $I_{NaP}$  inactivation/availability (bottom). Notice the irregular network burst frequency that occurs when  $I_{NaP}$  inactivation/availability is fixed.



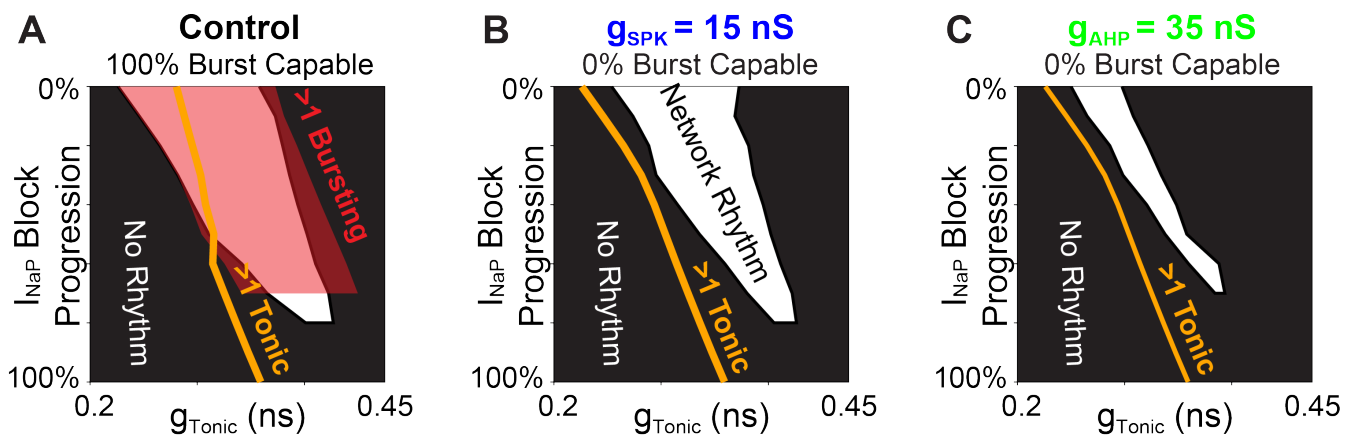

**Fig. S6.** Parameter space supporting intrinsic bursting (red) and network rhythmogenesis (white) as a function of excitability ( $g_{Tonic}$ ) during progressive  $I_{NaP}$  block in (A) a control network with 100% of neurons initially burst capable ( $g_{SPK} = g_{AHP} = 0$ ) and in networks with (B)  $g_{SPK} = 15$  nS or (C)  $g_{AHP} = 35$  nS to eliminate intrinsic bursting. Orange lines indicate  $g_{Tonic}$  value at which  $\geq 1$  neuron enters tonic spiking mode.

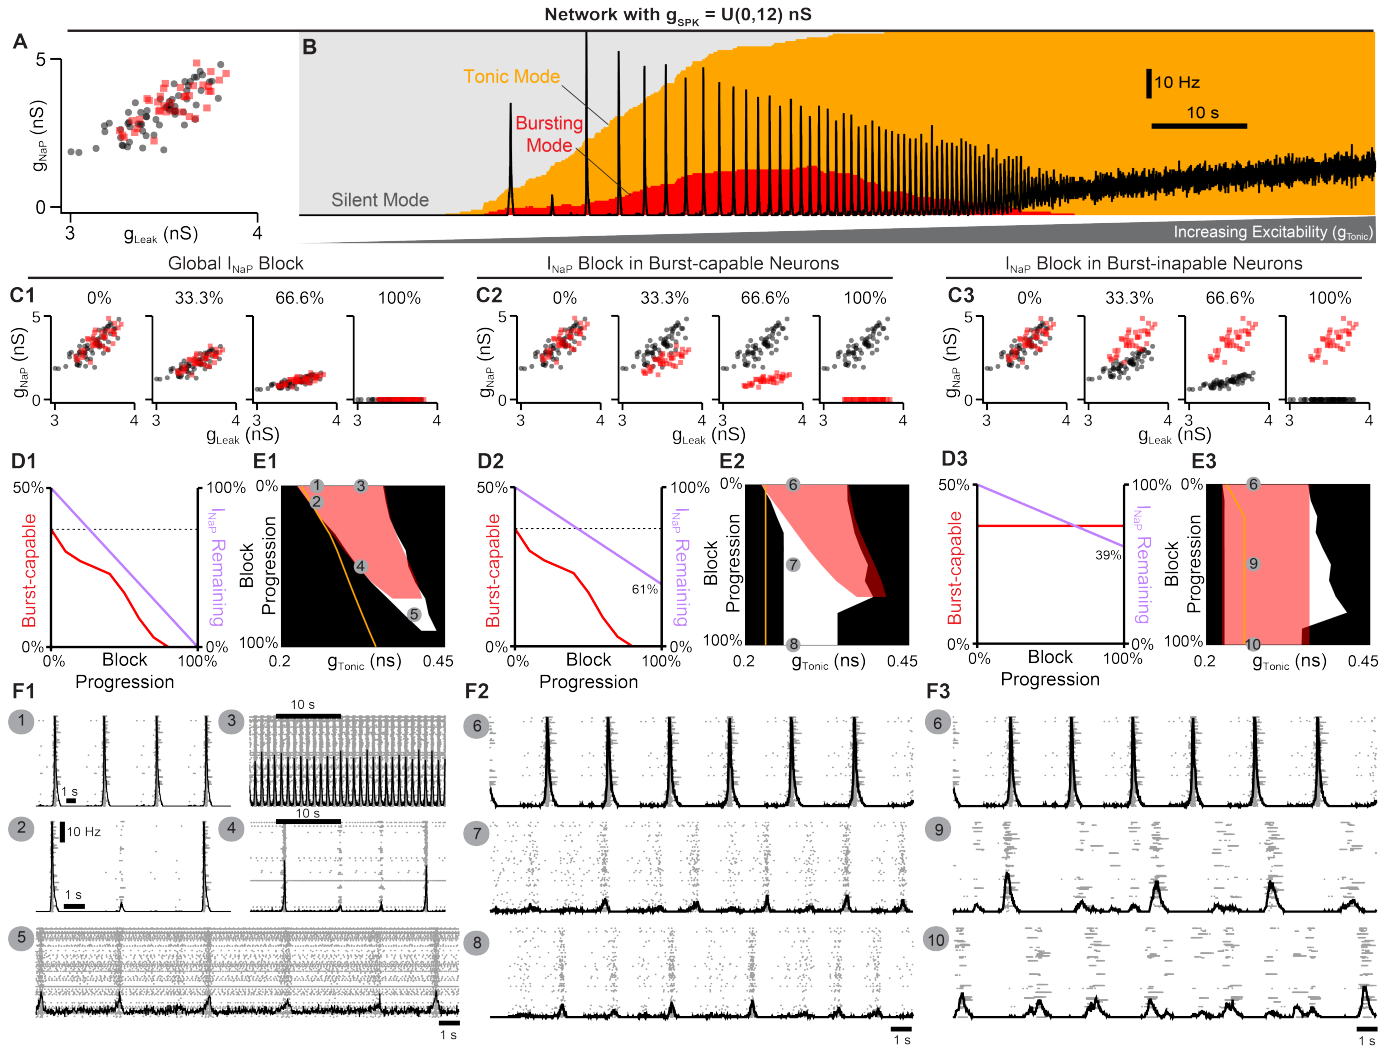

**Fig. S7. Selective block of  $I_{NaP}$  in burst-capable or burst-incapable neurons has similar consequences for rhythm generation.** (A) Distributions of  $g_{NaP}$  and  $g_{Leak}$  among burst-capable (red) and incapabile (black) neurons in a network with  $g_{SPK} = U(0, 12) \text{ nS}$ . (B) Prevalence of silent, bursting, and tonic intrinsic cellular activities with overlaid network firing rate during increasing  $g_{Tonic}$  in the same network. (C1-3) Comparison of global  $I_{NaP}$  block (C1) vs. progressive  $I_{NaP}$  block specifically in neurons that are initially burst-capable (C2) or burst-incapable (C3). (D1-3) Fraction of the network that is burst-capable and amount of  $I_{NaP}$  remaining as a function of  $I_{NaP}$  block progression. (E1-3) Parameter space supporting intrinsic bursting (red) and network rhythmogenesis (white) as a function of excitability ( $g_{Tonic}$ ) during progressive  $I_{NaP}$  block. (F1-F3) Raster plots and overlaid network firing rate corresponding to points 1-10 shown in E1-3.

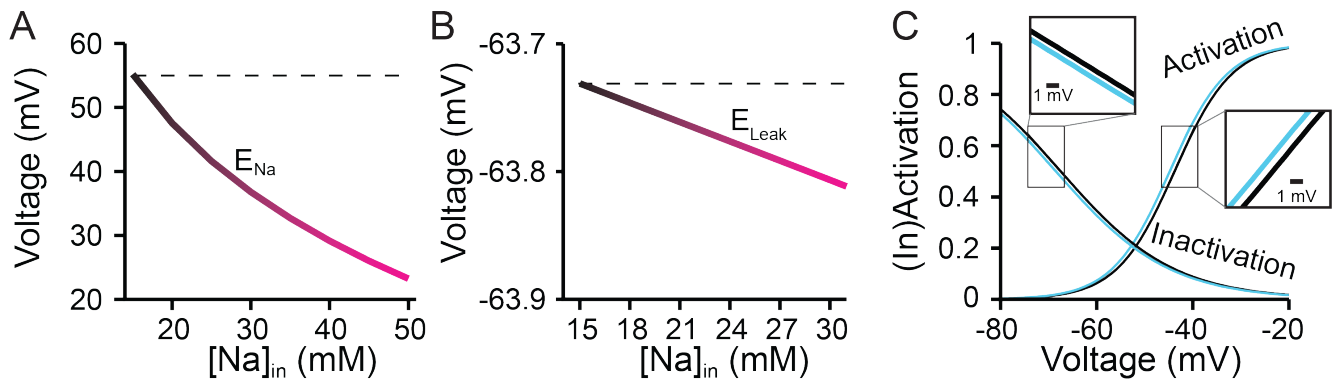

**Fig. S8.** Hypoxia related effects of accumulating  $[Na^+]_{in}$  on (A) the sodium reversal potential and the (B) leak reversal potential. (C) Simulated hyperpolarizing shift in the (in)activation dynamics of spike generating sodium currents.

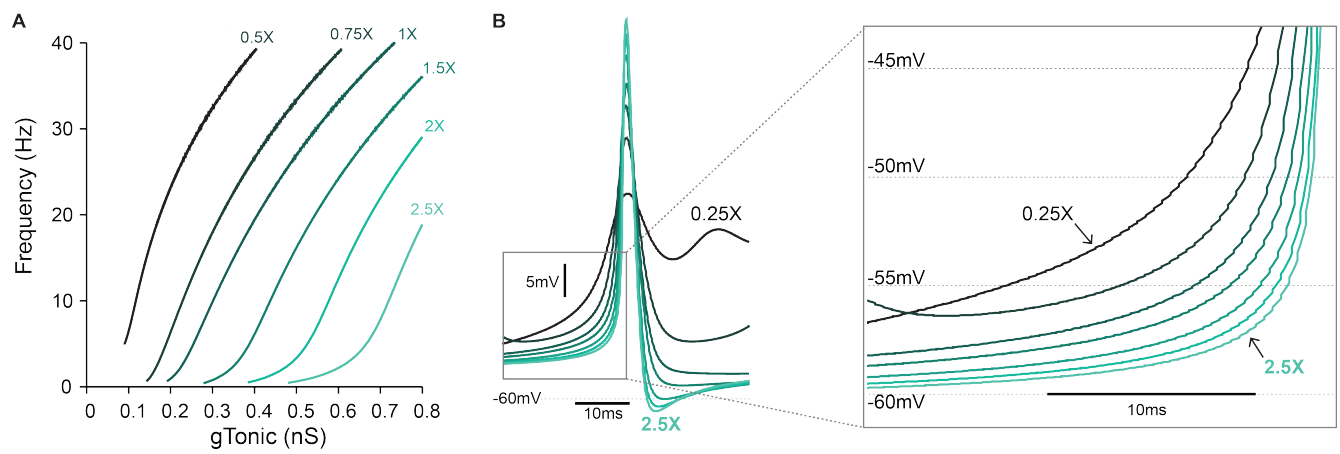

**Fig. S9.** Impact of conductance scaling on (A) the relationship between  $g_{Tonic}$  and firing rate and (B) the voltage "threshold" for spike generation.

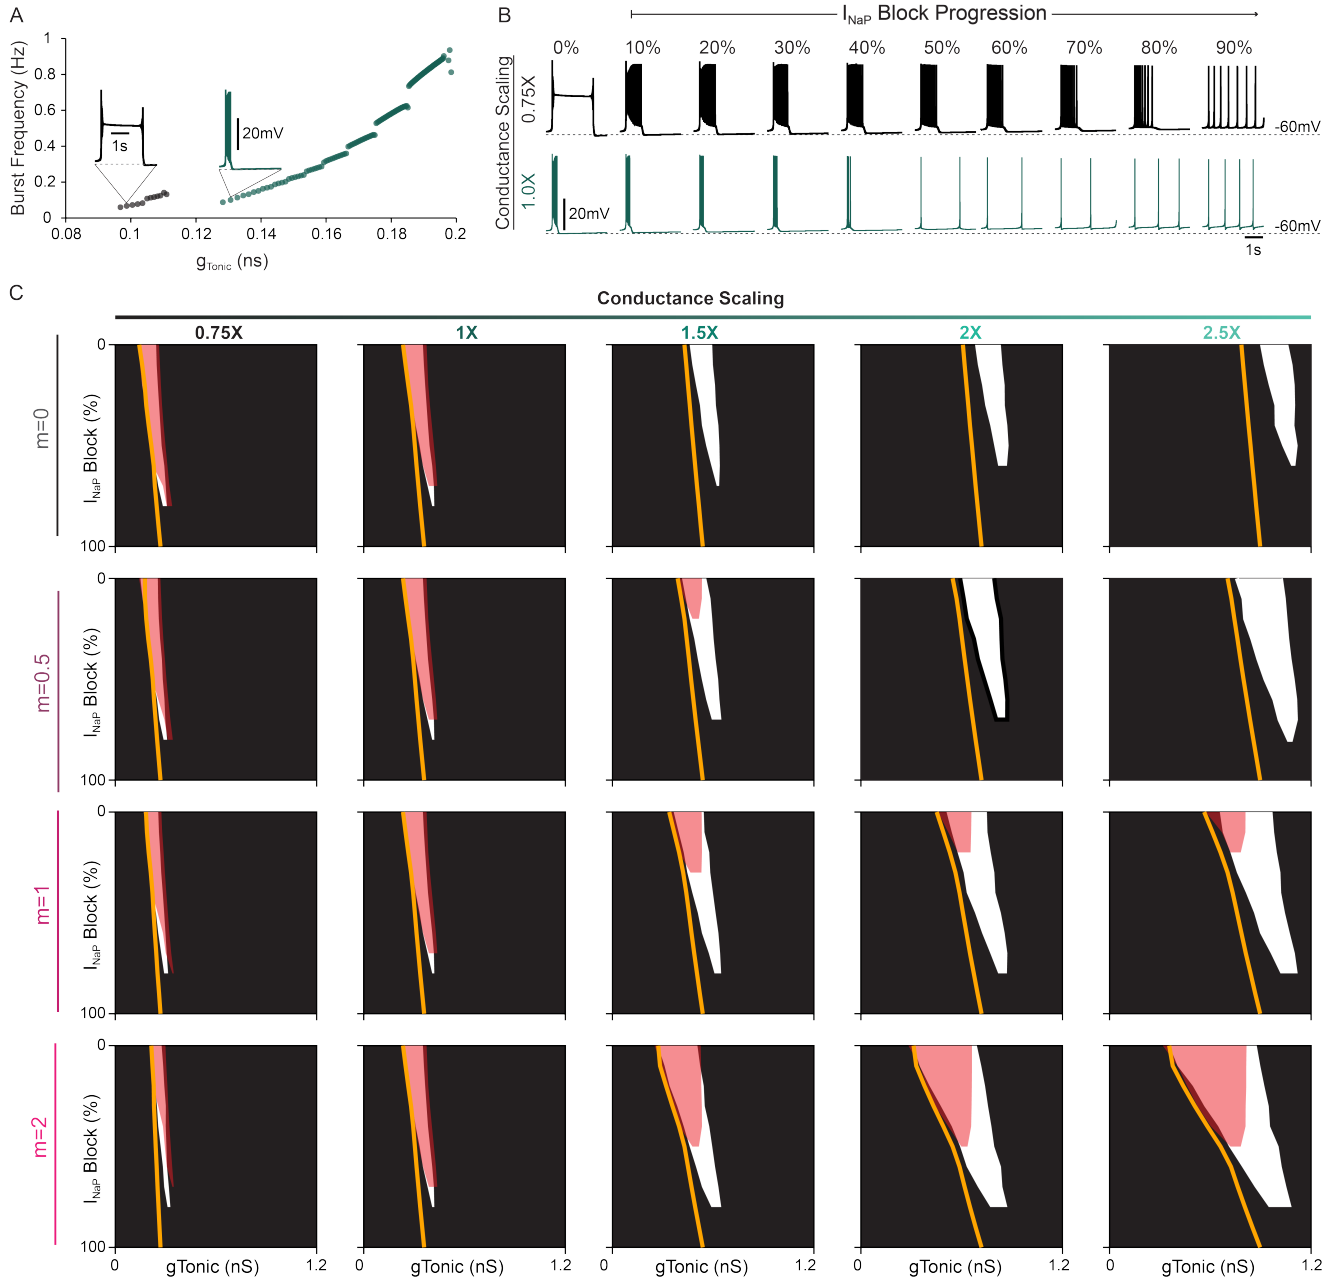

**Fig. S10.** (A) Relationship between excitability ( $g_{Tonic}$ ) and burst frequency and (B) effect of simulated  $I_{NaP}$  block on intrinsic bursting capabilities for a neuron in with reduced conductance scaling (0.75X,  $m=1$ ) compared to control scaling (1.0X,  $m=1$ ). (C) Parameter space supporting network rhythogenesis during progressive  $I_{NaP}$  block with scaled conductances.

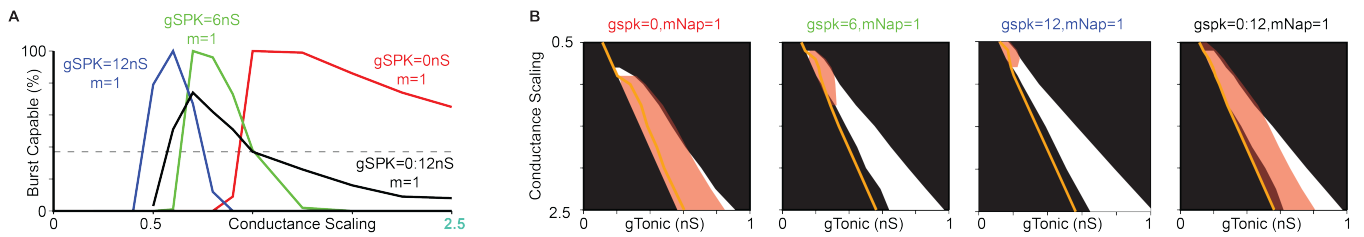

**Fig. S11.** Comparison of conductance scaling across networks with  $g_{SPK} = 0 nS$ ,  $g_{SPK} = 6 nS$ ,  $g_{SPK} = 12 nS$ , or  $g_{SPK} = U(0, 12) nS$  showing (A) fraction of the network that is burst-capable, and (B) parameter spaces supporting intrinsic bursting (red) and network rhythmogenesis (white) as conductances are up- or down-scaled (Orange lines indicate  $g_{Tonic}$  where  $\geq 1$  neuron enters tonic spiking mode).

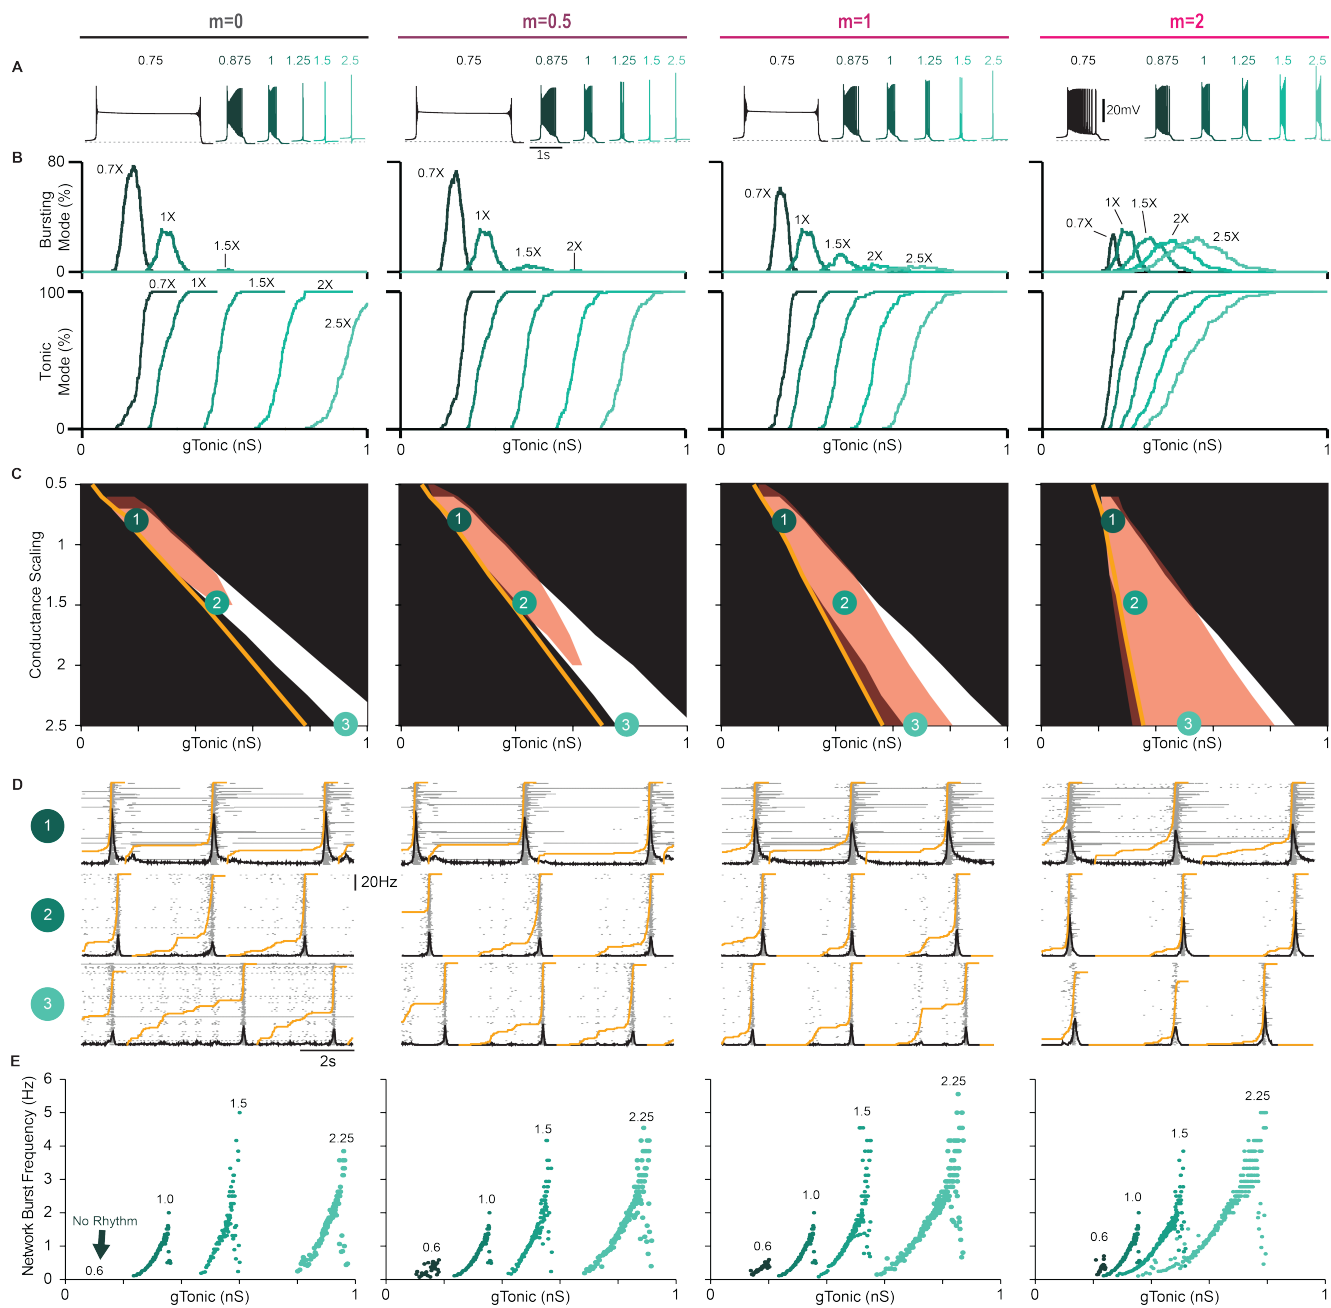

**Fig. S12.** (A) Example intrinsic bursting neurons during conductance scaling with  $m = 0 - 2$ . (B) Decreased excitability with conductance scaling as indicated by a rightward shift in the level of  $g_{Tonic}$  needed to initiate intrinsic bursting or tonic spiking. (C) Comparison of parameter space that supports intrinsic bursting (red) and network rhythmicity (white) as conductances are scaled with  $m$  ranging from 0 - 2 (Orange lines indicate  $g_{Tonic}$  where  $\geq 1$  neuron enters tonic spiking mode). (D) Raster plots and overlaid network firing rate corresponding to points 1-3 in (C) (Orange line indicate the percentage of neurons active since the preceding network burst). (E) Relationship between excitability ( $g_{Tonic}$ ) and network burst frequency as conductances are scaled with  $m$  ranging from 0 - 2.

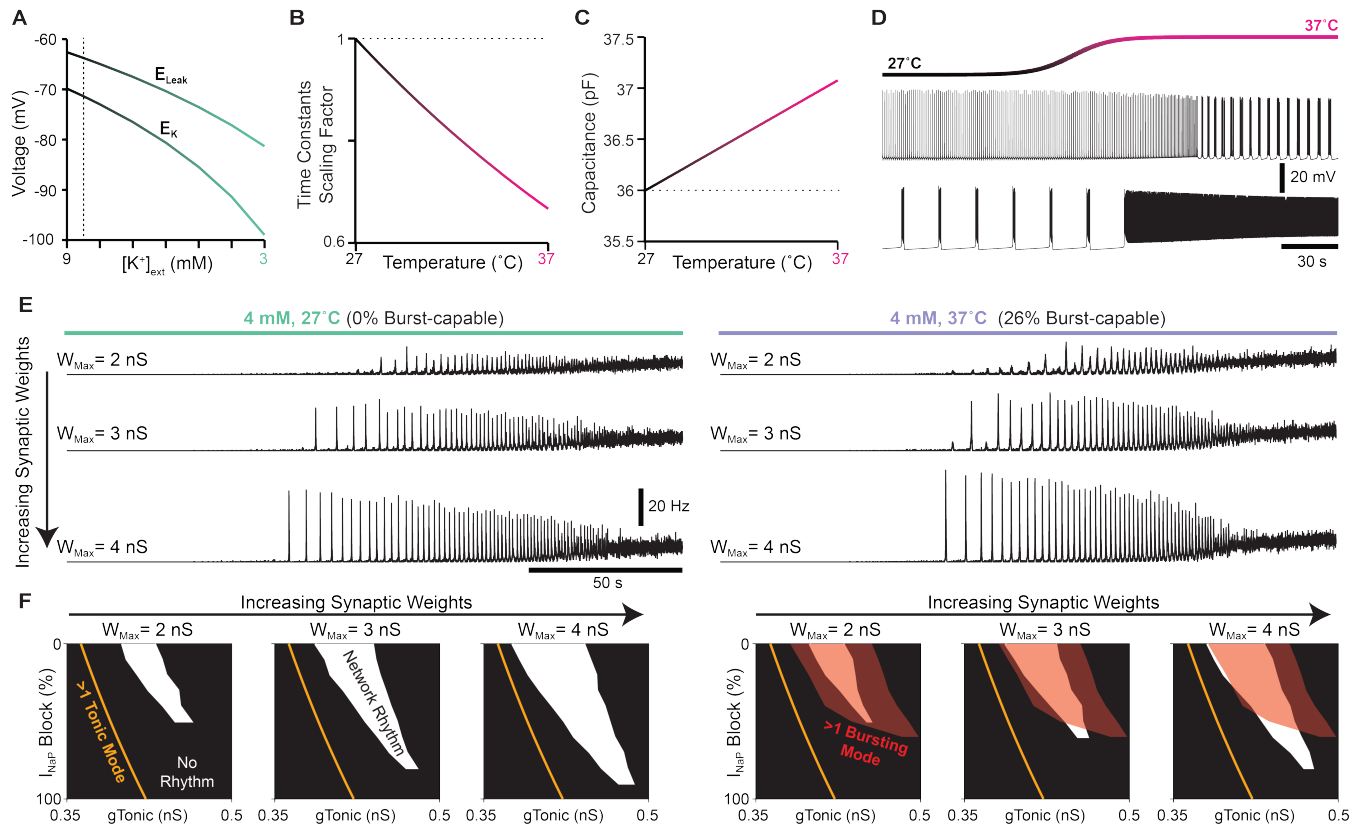

**Fig. S13.** Impact of extracellular potassium, temperature and synaptic weights on network properties and dynamics. (A) Relationship between the potassium ( $E_K$ ) and leak ( $E_{Leak}$ ) reversal potentials and extracellular potassium  $[K^+]_{ext}$ . Relationship between the scaling of time constants (B) and cellular capacitance (C) and the imposed temperature. (D) Example voltage traces illustrating the transition of a neuron from tonic to bursting mode and from bursting to tonic mode in response to an increase in temperature. (E) Effect of increases in synaptic weights on the network rhythm at physiological potassium and *in vitro* (left) or *in vivo* (right) temperatures. (F) Simulated  $I_{NaP}$  attenuation on network rhythms and intrinsic bursting.



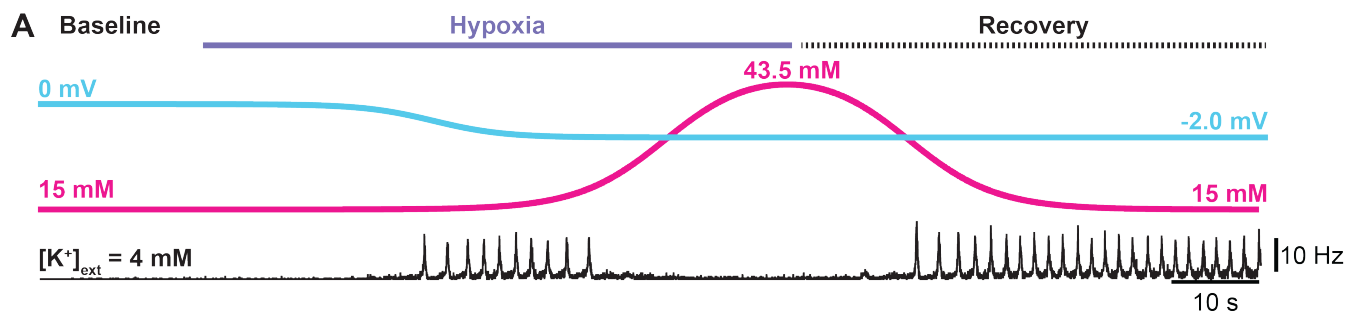

**Fig. S14.** Simulated hypoxia at physiological  $[K^+]_{ext}$ . (A) Network rhythm during transient hypoxia and recovery.

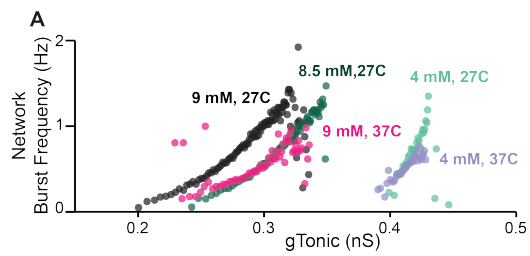

**Fig. S15.** (A) Effects of  $[K^+]_{ext}$  and/or temperature on the relationship between excitability and network burst frequency.

110 **References**

- 111 1. PE Jasinski, YI Molkov, NA Shevtsova, JC Smith, IA Rybak, Sodium and calcium mechanisms of rhythmic bursting in  
 112 excitatory neural networks of the pre-bötzing complex: a computational modelling study. *Eur. J. Neurosci.* **37**, 212–230  
 113 (2013).
- 114 2. RS Phillips, TT John, H Koizumi, YI Molkov, JC Smith, Biophysical mechanisms in the mammalian respiratory oscillator  
 115 re-examined with a new data-driven computational model. *Elife* **8**, e41555 (2019).
- 116 3. RS Phillips, JE Rubin, Effects of persistent sodium current blockade in respiratory circuits depend on the pharmacological  
 117 mechanism of action and network dynamics. *PLoS computational biology* **15**, e1006938 (2019).
- 118 4. A Kottick, CA Del Negro, Synaptic depression influences inspiratory–expiratory phase transition in dbx1 interneurons of  
 119 the prebötzing complex in neonatal mice. *J. Neurosci.* **35**, 11606–11611 (2015).
- 120 5. JE Rubin, JA Hayes, JL Mendenhall, CA Del Negro, Calcium-activated nonspecific cation current and synaptic depression  
 121 promote network-dependent burst oscillations. *Proc. Natl. Acad. Sci.* **106**, 2939–2944 (2009).
- 122 6. C Guerrier, JA Hayes, G Fortin, D Holcman, Robust network oscillations during mammalian respiratory rhythm generation  
 123 driven by synaptic dynamics. *Proc. Natl. Acad. Sci.* **112**, 9728–9733 (2015).
- 124 7. LF Abbott, J Varela, K Sen, S Nelson, Synaptic depression and cortical gain control. *Science* **275**, 221–224 (1997).
- 125 8. P Dayan, LF Abbott, *Theoretical neuroscience: computational and mathematical modeling of neural systems.* (Computa-  
 126 tional Neuroscience Series), (2001).
- 127 9. A Morrison, M Diesmann, W Gerstner, Phenomenological models of synaptic plasticity based on spike timing. *Biol.*  
 128 *cybernetics* **98**, 459–478 (2008).
- 129 10. JC Rekling, XM Shao, JL Feldman, Electrical coupling and excitatory synaptic transmission between rhythmogenic  
 130 respiratory neurons in the prebötzing complex. *J. Neurosci.* **20**, RC113–RC113 (2000).
- 131 11. CA Del Negro, N Koshiya, RJ Butera Jr, JC Smith, Persistent sodium current, membrane properties and bursting behavior  
 132 of pre-bötzing complex inspiratory neurons in vitro. *J. neurophysiology* **88**, 2242–2250 (2002).
- 133 12. H Koizumi, JC Smith, Persistent na<sup>+</sup> and k<sup>+</sup>-dominated leak currents contribute to respiratory rhythm generation in the  
 134 pre-bötzing complex in vitro. *J. Neurosci.* **28**, 1773–1785 (2008).
- 135 13. LD Plant, JD Marks, SA Goldstein, Sumoylation of nav1. 2 channels mediates the early response to acute hypoxia in  
 136 central neurons. *Elife* **5**, e20054 (2016).
- 137 14. DC Sterratt, Q10: the effect of temperature on ion channel kinetics in *Encyclopedia of Computational Neuroscience.*  
 138 (Springer New York), pp. 2551–2552 (2015).
- 139 15. CA Collins, E Rojas, Temperature dependence of the sodium channel gating kinetics in the node of ranvier. *Q. J. Exp.*  
 140 *Physiol. Transl. Integration* **67**, 41–55 (1982).
- 141 16. JF Fohlmeister, ED Cohen, EA Newman, Mechanisms and distribution of ion channels in retinal ganglion cells: using  
 142 temperature as an independent variable. *J. neurophysiology* **103**, 1357–1374 (2010).
- 143 17. Y Yu, AP Hill, DA McCormick, Warm body temperature facilitates energy efficient cortical action potentials. *PLoS*  
 144 *computational biology* **8**, e1002456 (2012).
- 145 18. JS Caplan, AH Williams, E Marder, Many parameter sets in a multicompartiment model oscillator are robust to temperature  
 146 perturbations. *J. Neurosci.* **34**, 4963–4975 (2014).
- 147 19. MG Shapiro, K Homma, S Villarreal, CP Richter, F Bezanilla, Infrared light excites cells by changing their electrical  
 148 capacitance. *Nat. communications* **3**, 736 (2012).
- 149 20. B Pinto, CAZ Bassetto Jr, R Latorre, F Bezanilla, Measuring temperature time course using membrane capacitance.  
 150 *Biophys. J.* **120**, 240a (2021).
- 151 21. BI Pinto, CA Bassetto Jr, F Bezanilla, Optocapacitance: physical basis and its application. *Biophys. Rev.* **14**, 569–577  
 152 (2022).
- 153 22. M Plaksin, E Shapira, E Kimmel, S Shoham, Thermal transients excite neurons through universal intramembrane  
 154 mechanoelectrical effects. *Phys. Rev. X* **8**, 011043 (2018).
